# Supplementary material
Source: Springer Nature journal article supplement (https://www.springermedizin.de/resource/supplementary/13046_2011_537_MOESM1_ESM.pdf/9662488)
Supplement: MOESM1 [file 9662488]

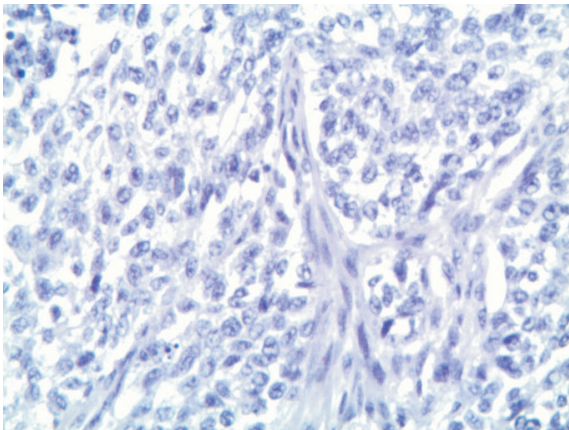

**Negative SGK1 staining**

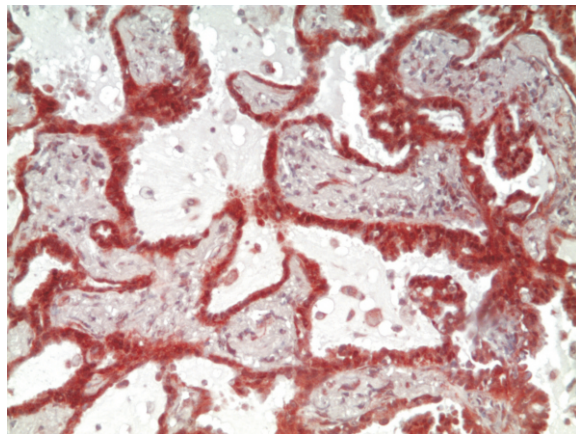

**High SGK1 staining**

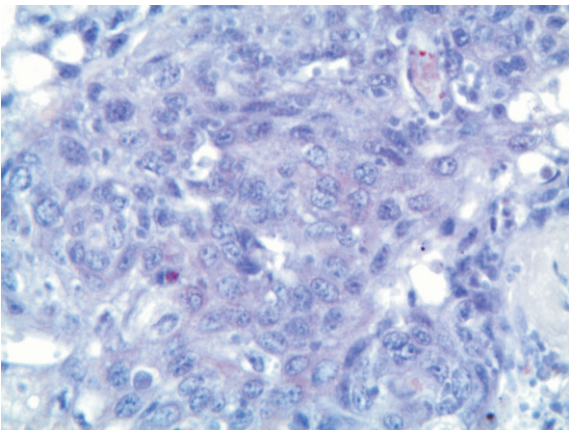

**Negative phospho-SGK1 staining**

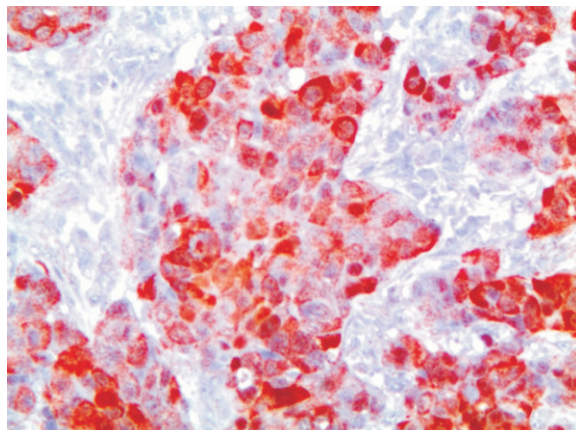

**High phospho-SGK1 staining**
